# Supplementary material
Source: Springer Nature journal article supplement (https://www.springermedizin.de/resource/supplementary/12879_2014_3195_MOESM1_ESM.pdf/9446206)

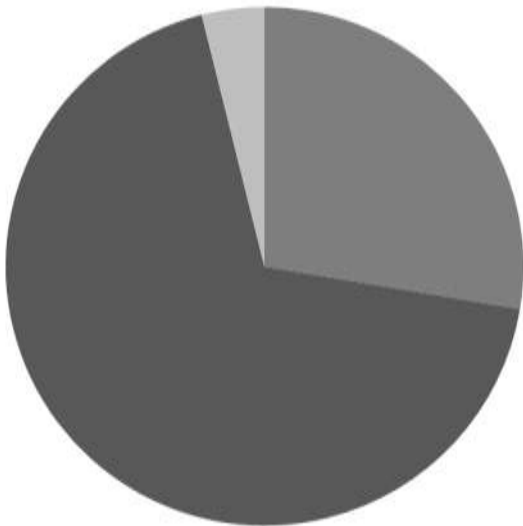

■ Urogenital only (27,6%, n=21)

■ Urogenital and anorectal  
(68,4%, n=52)

■ Anorectal only (3,9%, n=3)

Supplement: MOESM1 [file 9446206]
